# Supplementary material for: Female sex in experimental traumatic brain injury research: forging a path forward
Source: PubMed Central journal article supplement — Neural Regen Res. 2021 Aug 4;17(3):550–2. doi: 10.4103/1673-5374.316602 (PMC8504385; doi:10.4103/1673-5374.316602), 2021-08-04
Supplement: NRR-17-550_Suppl1.pdf [file NRR-17-550_Suppl1.pdf]

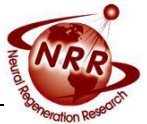

## OPEN PEER REVIEW REPORT

**Name of journal:** Neural Regeneration Research

**Manuscript NO:** NRR-D-21-00171

**Title:** Sex-dependent outcomes after traumatic brain injury: forging a path forward

**Reviewer's Name:** Zachary M. Weil

**Reviewer's country:** USA

**Date sent for review:** 2021-3-3

### COMMENTS TO AUTHORS

This is an interesting perspective on the role of sex differences in the design and conduct of experiments in the TBI domain. The perspective is well written and clearly identifies the problem, though beyond recommending supplementary funding mechanisms, I would have liked to see more of a definitive recommendation as to how the field should proceed. I think that the problems are very clear to grant writers and those on study sections, what is not clear is what the solution is and I am not sure that this paper stakes a particular position.
